# Supplementary material for: Cross-sectional and longitudinal determinants of serum sex hormone binding globulin (SHBG) in a cohort of community-dwelling men
Source: PubMed Central journal article supplement (PMC6040731; doi:10.1371/journal.pone.0200078), 2018-07-11
Supplement: pone.0200078.s002.pdf [file pone.0200078.s002.pdf]

| Determinants/factors                                         | <b>ΔSHBG=1.38±9.3</b> |                |                  |                |                  |                             |                  |                  |                  |
|--------------------------------------------------------------|-----------------------|----------------|------------------|----------------|------------------|-----------------------------|------------------|------------------|------------------|
|                                                              | Unadjusted model      |                |                  | Age-adjusted   |                  | Multi-adjusted (Full model) |                  | LASSO regression |                  |
|                                                              | Mean difference ± SD  | Standardized β | P-value          | Standardized β | P-value          | Standardized β              | P-value          | Standardized β   | P-value          |
| <b>Demographic, behavioural &amp; anthropometric factors</b> |                       |                |                  |                |                  |                             |                  |                  |                  |
| Δ Age , Years                                                | 4.6 ± 0.6             | <b>0.218</b>   | <b>&lt;0.001</b> | -              | -                | 0.000                       | 0.999            | -                | -                |
| Δ Physical activity                                          | 148.7 ± 2346.9        | 0.035          | 0.450            | 0.035          | 0.457            | 0.032                       | 0.524            | -                | -                |
| Δ Abdominal total fat mass (%)                               | -2401.8 ± 894.6       | -0.063         | 0.100            | -0.063         | 0.098            | -0.045                      | 0.369            | -                | -                |
| <b>Blood chemistry &amp; hormones</b>                        |                       |                |                  |                |                  |                             |                  |                  |                  |
| Δ Triglycerides (mmol/L)                                     | -0.053 ± 1.53         | -0.028         | 0.275            | -0.030         | 0.242            | <b>-0.157</b>               | <b>0.002</b>     | <b>-0.165</b>    | <b>0.001</b>     |
| Δ Glucose (mmol/L)                                           | 0.328 ± 1.257         | 0.020          | 0.440            | -0.002         | 0.944            | -0.007                      | 0.888            | -                | -                |
| Δ Insulin (μIU/mL) <sup>a</sup>                              | -1.2 ± 7.8            | -0.058         | 0.101            | -0.060         | 0.095            | 0.008                       | 0.876            | -                | -                |
| Δ ALT activity (U/L) <sup>b</sup>                            | -2.0 ± 19.7           | 0.002          | 0.950            | 0.003          | 0.929            | 0.083                       | 0.106            | -                | -                |
| Δ fT4 (pmol/L)                                               | 1.8 ± 3.3             | -0.003         | 0.919            | <b>0.061</b>   | <b>0.026</b>     | <b>0.159</b>                | <b>0.002</b>     | <b>0.173</b>     | <b>0.001</b>     |
| Δ TT (nmol/L)                                                | -0.631 ± 4.3          | <b>0.333</b>   | <b>&lt;0.001</b> | <b>0.348</b>   | <b>&lt;0.001</b> | <b>0.406</b>                | <b>&lt;0.001</b> | <b>0.403</b>     | <b>&lt;0.001</b> |
| Δ E2 (pmol/L) <sup>c</sup>                                   | -9.3 ± 39.9           | <b>0.074</b>   | <b>0.033</b>     | 0.057          | 0.107            | <b>-0.114</b>               | <b>0.035</b>     | <b>-0.110</b>    | <b>0.038</b>     |
| <b>Inflammatory markers</b>                                  |                       |                |                  |                |                  |                             |                  |                  |                  |
| Δ IL-6 (pg/mL)                                               | 0.047 ± 1.9           | <b>-0.063</b>  | <b>0.017</b>     | <b>-0.074</b>  | <b>0.004</b>     | <b>-0.119</b>               | <b>0.019</b>     | <b>-0.109</b>    | <b>0.028</b>     |
| Δ TNF-α (pg/mL)                                              | 0.137 ± 2.9           | <b>-0.079</b>  | <b>0.003</b>     | <b>-0.072</b>  | <b>0.005</b>     | 0.041                       | 0.423            | -                | -                |
| Δ MPO activity (μg/L)                                        | -26.7 ± 329.1         | 0.004          | 0.893            | -0.005         | 0.849            | 0.060                       | 0.249            | -                | -                |
| Δ eSel (ng/mL)                                               | -0.218 ± 11.4         | -0.032         | 0.277            | -0.036         | 0.164            | -0.022                      | 0.676            | -                | -                |
