# Supplementary material for: Cross-sectional and longitudinal determinants of serum sex hormone binding globulin (SHBG) in a cohort of community-dwelling men
Source: PubMed Central journal article supplement (PMC6040731; doi:10.1371/journal.pone.0200078), 2018-07-11
Supplement: pone.0200078.s003.pdf [file pone.0200078.s003.pdf]

| Determinants/factors                  | Multi-adjusted (Full model)         |                  |                                     |                  |                                           |              |
|---------------------------------------|-------------------------------------|------------------|-------------------------------------|------------------|-------------------------------------------|--------------|
|                                       | Test below likelihood ratio cut-off |                  | Test above likelihood ratio cut-off |                  | Test for overall association (continuous) |              |
|                                       | Standardized $\beta$                | P-value          | Standardized $\beta$                | P-value          | Standardized $\beta$                      | P-value      |
| <b>Blood chemistry &amp; hormones</b> |                                     |                  |                                     |                  |                                           |              |
| Triglycerides (mmol/L) <sup>a</sup>   | <b>-0.171</b>                       | <b>&lt;0.001</b> | <b>-0.143</b>                       | <b>&lt;0.001</b> | <b>-0.065</b>                             | <b>0.027</b> |
| Glucose (mmol/L) <sup>b</sup>         | -0.003                              | 0.925            | 0.003                               | 0.930            | -0.049                                    | 0.145        |
| Insulin ( $\mu$ U/mL) <sup>c</sup>    | 0.017                               | 0.651            | -0.030                              | 0.423            | -0.009                                    | 0.806        |
| ALT activity (U/L) <sup>d</sup>       | <b>0.152</b>                        | <b>&lt;0.001</b> | <b>-0.166</b>                       | <b>&lt;0.001</b> | -0.054                                    | 0.118        |
| E2 (pmol/L) <sup>e</sup>              | <b>-0.138</b>                       | <b>&lt;0.001</b> | <b>0.134</b>                        | <b>&lt;0.001</b> | -0.023                                    | 0.490        |
| <b>Inflammatory markers</b>           |                                     |                  |                                     |                  |                                           |              |
| IL-6 (pg/mL) <sup>f</sup>             | -0.007                              | 0.845            | 0.006                               | 0.871            | 0.047                                     | 0.150        |
| TNF- $\alpha$ (pg/mL) <sup>g</sup>    | 0.009                               | 0.807            | -0.015                              | 0.681            | 0.037                                     | 0.243        |
| eSel (ng/mL) <sup>h</sup>             | 0.055                               | 0.141            | -0.052                              | 0.168            | 0.045                                     | 0.208        |
